# Supplementary material for: Growth and actual leaf temperature modulate CO 2 responsiveness of monoterpene emissions from holm oak in opposite ways
Source: Copernicus journal article supplement (doi:10.5194/bg-19-4945-2022), 2022-10-26
Supplement: Supplementary file 1 [file bg-19-4945-2022-supplement.zip]

Archive with 4 entries (4 files):
- bg-2022-142 Supplement3.docx
- bg-2022-142 Supplement1.docx
- bg-2022-142 Supplement2.xlsx
- bg-19-4945-2022-supplement-title-page.pdf
