# Supplementary material for: Growth and actual leaf temperature modulate CO 2 responsiveness of monoterpene emissions from holm oak in opposite ways
Source: Copernicus journal article supplement (doi:10.5194/bg-19-4945-2022), 2022-10-26
Supplement: Supplementary file 1 [file bg-19-4945-2022-supplement.zip › bg-19-4945-2022-supplement-title-page.pdf]

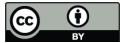

*Supplement of*

**Growth and actual leaf temperature modulate CO<sub>2</sub> responsiveness of monoterpene emissions from holm oak in opposite ways**

**Michael Staudt et al.**

*Correspondence to:* Michael Staudt ([michael.staudt@cefe.cnrs.fr](mailto:michael.staudt@cefe.cnrs.fr))

- [bg-19-4945-2022-supplement-title-page.pdf](#)
- [bg-2022-142 Supplement1.docx](#)
- [bg-2022-142 Supplement2.xlsx](#)
- [bg-2022-142 Supplement3.docx](#)

The copyright of individual parts of the supplement might differ from the article licence.
