# Supplementary material for: Growth and actual leaf temperature modulate CO 2 responsiveness of monoterpene emissions from holm oak in opposite ways
Source: Copernicus journal article supplement (doi:10.5194/bg-19-4945-2022), 2022-10-26
Supplement: Supplementary file 1 [file bg-19-4945-2022-supplement.zip › bg-2022-142 Supplement2.xlsx]

## Sheet: Figure S1 
	Data	Real Value	Measured Values ( = Real Value ± 10%)								normalization to E400		normalization to mean
	Leaf	E	E400	E200	E100	E800	E1200	E1600	E2000	Emean	E<400 E400-1	E>400 E400-1	E<400 Emean-1	E>400 Emean-1
	1	1171.06	1375.19	1323.37	1200.96	1393.1	1241.51	1372.9	1266.58	1310.52	0.91781	0.958791	0.963106	1.00611
	2	960.402	1087.64	959.489	1073.6	981.886	978.23	987.131	1051.25	1017.03	0.934633	0.919074	0.999521	0.982883
	3	1350.78	1591.76	1437.14	1498.79	1375.83	1414.31	1388.55	1387.28	1441.95	0.922226	0.874184	1.01804	0.965006
	4	510.536	560.136	570.404	596.949	523.466	525.782	536.978	565.3	554.145	1.04203	0.960269	1.05329	0.970651
	5	1383.27	1507.78	1483.17	1424.26	1405.83	1467.68	1407.99	1629.55	1475.18	0.964147	0.980093	0.985451	1.00175
	6	1345.24	1444.4	1389.15	1425.8	1510.28	1484.57	1452.21	1535.1	1463.07	0.974434	1.03541	0.961998	1.02219
	7	536.06	579.133	625.504	553.14	619.758	542.343	619.579	626.215	595.096	1.01759	1.03944	0.990297	1.01156
	8	1242.8	1381.49	1435.99	1331.62	1418.41	1393.75	1370.98	1246.64	1368.41	1.00167	0.982591	1.01125	0.991985
	9	949.587	1036.08	980.798	1091.14	1014.42	1054.16	966.073	1039.16	1025.98	0.999892	0.982986	1.00974	0.992668
	10	801.213	948.247	860.174	908.65	868.619	950.241	939.138	824.622	899.956	0.932681	0.944538	0.982728	0.995221
	11	989.569	1099.3	998.98	1089.8	1086.25	1155.77	1093.74	1179.46	1100.47	0.950052	1.02684	0.94904	1.02575
	12	765.732	905.026	839.1	873.746	816.914	780.111	771.409	841.516	832.546	0.946296	0.886701	1.02868	0.963896
	13	787.955	790.774	856.539	892.172	926.821	819.909	860.031	886.106	861.765	1.1057	1.10426	1.01461	1.01329
	14	1073.1	1092.98	1227.67	1243.16	1102.6	1073.03	1185.07	1223.49	1164	1.13032	1.04855	1.06135	0.984576
	15	1004.14	1120.95	1005.21	1003.6	1139.99	1179.37	1091.81	1065.4	1086.62	0.896033	0.998388	0.924341	1.02993
	16	1388.25	1517.65	1604.46	1389.98	1415.88	1440.98	1636.88	1410.85	1488.1	0.986538	0.972656	1.00613	0.991971
	17	1472.63	1720.63	1487.72	1478.07	1719.43	1648.97	1544.87	1613.29	1601.85	0.861831	0.948277	0.925737	1.01859
	18	1002.73	1028.05	1200.55	1003.94	1177.15	1063.91	1004.33	1080.83	1079.82	1.07217	1.05204	1.02077	1.0016
	19	1413.2	1566.8	1477.22	1557.85	1445.82	1662.53	1674.52	1424.5	1544.18	0.968558	0.990456	0.982746	1.00496
	20	736.094	744.861	760.703	855.462	858.339	761.469	837.872	827.389	806.585	1.08488	1.10258	1.00186	1.0182
	21	667.061	731.597	689.326	719.387	782.702	764.532	774.108	695.47	736.732	0.962767	1.0309	0.956056	1.02371
	22	956.289	1010.12	1057.18	1095.4	957.076	1137.79	1046.21	1081.99	1055.11	1.0655	1.04518	1.02007	1.00062
	23	1253.11	1370.72	1495.72	1425.8	1331.5	1296.38	1460.85	1272.01	1379	1.06569	0.977722	1.05929	0.971855
	24	1023.33	1053.15	1210.49	1209.13	1093.5	1066.57	1050.15	1081.72	1109.24	1.14875	1.01883	1.09066	0.967311
	25	1345.7	1377.62	1582.46	1421.53	1524.63	1565.3	1504.33	1492.66	1495.5	1.09029	1.10461	1.00434	1.01754
	26	509.096	572.77	606.403	542.941	578.273	510.1	590.963	510.361	558.83	1.00332	0.955749	1.02835	0.97959

## Sheet: Table S3
	Table S3(a). Matrix of correlation coefficients (R) of measurements at 30 °C. Values in bold are different from 0 at significance level alpha=0.05.																													Table S3(a). Matrix of correlation coefficients (R) of measurements at 35 °C. Values in bold are different from 0 at significance level alpha=0.05.
	30°C	No leaves	[Chlorophyll]	LMA	Fv/Fmini	A400	Rini	G400	ETR400	NPQ400	EF400																			35 °C	No leaves	[Chlorophyll]	LMA	Fv/Fmini	A400	Rini	G400	ETR400	NPQ400	EF400
	No leaves	1	-0.349168	0.0132719	0.357443	0.736232	0.367188	0.642557	0.690498	-0.571778	0.779425																			No leaves	1	-0.348642	0.00898689	0.299707	0.632546	0.440025	0.579515	0.581399	-0.508481	0.703864
	[Chlorophyll]	-0.349168	1	0.417651	0.198328	-0.349206	0.259831	-0.328862	-0.315523	0.112733	-0.445443																			[Chlorophyll]	-0.348642	1	0.523301	0.110213	0.0311031	0.213229	-0.0152661	-0.000870538	0.171506	-0.184824
	LMA	0.0132719	0.417651	1	0.119396	0.0225614	0.0800324	-0.00588364	-0.0355681	0.0509399	0.0951691																			LMA	0.00898689	0.523301	1	-0.282675	0.006199	0.215305	-0.0243557	-0.00579045	0.257382	-0.0653432
	Fv/Fmini	0.357443	0.198328	0.119396	1	0.362527	0.210137	0.366524	0.350493	-0.304373	0.166111																			Fv/Fmini	0.299707	0.110213	-0.282675	1	0.568348	0.332277	0.434921	0.61798	-0.167781	0.573413
	A400	0.736232	-0.349206	0.0225614	0.362527	1	0.423745	0.896889	0.633763	-0.411161	0.526887																			A400	0.632546	0.0311031	0.006199	0.568348	1	0.596166	0.961285	0.825769	-0.614967	0.76885
	Rini	0.367188	0.259831	0.0800324	0.210137	0.423745	1	0.452032	-0.106218	0.0357416	0.0834489																			Rini	0.440025	0.213229	0.215305	0.332277	0.596166	1	0.53996	0.560666	-0.510868	0.525157
	G400	0.642557	-0.328862	-0.00588364	0.366524	0.896889	0.452032	1	0.537152	-0.285899	0.321015																			G400	0.579515	-0.0152661	-0.0243557	0.434921	0.961285	0.53996	1	0.718045	-0.579362	0.64453
	ETR400	0.690498	-0.315523	-0.0355681	0.350493	0.633763	-0.106218	0.537152	1	-0.835092	0.646803																			ETR400	0.581399	-0.000870538	-0.00579045	0.61798	0.825769	0.560666	0.718045	1	-0.6715	0.837978
	NPQ400	-0.571778	0.112733	0.0509399	-0.304373	-0.411161	0.0357416	-0.285899	-0.835092	1	-0.551201																			NPQ400	-0.508481	0.171506	0.257382	-0.167781	-0.614967	-0.510868	-0.579362	-0.6715	1	-0.641552
	EF400	0.779425	-0.445443	0.0951691	0.166111	0.526887	0.0834489	0.321015	0.646803	-0.551201	1																			EF400	0.703864	-0.184824	-0.0653432	0.573413	0.76885	0.525157	0.64453	0.837978	-0.641552	1
	Table S3(b). Matrix of correlation coefficients (R) of measurements at 30 °C. Values in bold are different from 0 at significance level alpha=0.05.																													Table S3(b). Matrix of correlation coefficients (R) of measurements at 35 °C. Values in bold are different from 0 at significance level alpha=0.05.
	30°C	No leaves	[Chloro]	LMA	d Fv/Fm	Fv/Fmini	µA>400A400-1	µA<400A400-1	A400	Rini	dR	µG>400G400-1	µG<400G400-1	G400	µETR>400ETR400-1	µETR<400ETR400-1	ETR400	µNPQ>400NPQ400-1	µNPQ<400NPQ400-1	NPQ400	µETR/A>400ETR/A400-1	µETR/A<400ETR/A400-1	ETR/A400	C-loss400	É-loss400	µE>400E400-1	µE<400E400-1	EF400		35°C	No leaves	[Chloro]	LMA	d Fv/Fm	Fv/Fmini	µA>400A400-1	µA<400A400-1	A400	Rini	dR	µG>400G400-1	µG<400G400-1	G400	µETR>400ETR400-1	µETR<400ETR400-1	ETR400	µNPQ>400NPQ400-1	µNPQ<400NPQ400-1	NPQ400
	No leaves	1	-0.349168	0.0132719	-0.519698	0.357443	-0.10983	-0.054583	0.736232	0.367188	-0.27046	-0.253622	-0.190421	0.642557	-0.113708	0.0175011	0.690498	-0.163712	0.508959	-0.571778	-0.0174658	0.0253141	-0.464127	-0.0568271	0.38424	-0.064003	-0.123188	0.779425		No leaves	0	0.111217	0.953255	0.0131763	0.102434	0.626573	0.80936	< 0,0001	0.0927544	0.223464	0.254745	0.395979	0.00126057	0.614369	0.938384	0.000374966	0.466621	0.0155602	0.00543342
	[Chloro]	-0.349168	1	0.417651	0.416095	0.198328	-0.172915	-0.139416	-0.349206	0.259831	-0.0231101	0.00861369	0.082423	-0.328862	-0.236164	-0.0213992	-0.315523	0.120323	-0.235937	0.112733	0.0535918	0.118107	0.260086	-0.111703	-0.274356	0.0724997	0.0685159	-0.445443		[Chloro]	0.111217	0	0.0531057	0.0540891	0.376276	0.441581	0.536059	0.111175	0.242901	0.918692	0.969653	0.71537	0.135074	0.290006	0.924694	0.152605	0.593782	0.290483	0.61743
	LMA	0.0132719	0.417651	1	-0.0746399	0.119396	0.100147	-0.0566192	0.0225614	0.0800324	-0.13397	-0.157088	-0.145387	-0.00588364	0.340843	-0.0335425	-0.0355681	-0.262393	-0.203614	0.0509399	-0.0588924	-0.18338	0.0290984	-0.163845	0.0142783	0.23205	0.0184528	0.0951691		LMA	0.953255	0.0531057	0	0.741311	0.596649	0.626425	0.783528	0.912888	0.723308	0.552256	0.443451	0.47854	0.977243	0.120595	0.882196	0.875134	0.238118	0.363424	0.82188
	d Fv/Fm	-0.519698	0.416095	-0.0746399	1	-0.0428039	-0.312835	-0.0184775	-0.381843	0.147524	-0.156236	-0.0450604	0.120047	-0.311289	-0.272308	-0.0503858	-0.505754	0.363502	-0.266301	0.201517	0.263777	0.117219	0.0758434	-0.0147865	-0.124528	-0.168503	0.291956	-0.410189		d Fv/Fm	0.0131763	0.0540891	0.741311	0	0.849987	0.156322	0.934953	0.0794975	0.512367	0.487483	0.842173	0.594632	0.158489	0.220192	0.823787	0.0163357	0.0963322	0.230942	0.368491
	Fv/Fmini	0.357443	0.198328	0.119396	-0.0428039	1	-0.117288	-0.0844799	0.362527	0.210137	-0.107935	-0.124754	0.166913	0.366524	-0.0422796	0.00763522	0.350493	0.0867624	0.278848	-0.304373	0.0520457	0.22194	-0.224466	-0.260783	-0.108161	0.159514	0.0408775	0.166111		Fv/Fmini	0.102434	0.376276	0.596649	0.849987	0	0.603192	0.708564	0.0972954	0.347919	0.632573	0.580152	0.457831	0.093392	0.851805	0.973099	0.109775	0.701036	0.208872	0.168438
	µA>400A400-1	-0.10983	-0.172915	0.100147	-0.312835	-0.117288	1	0.41747	-0.287025	-0.244937	0.303716	0.666841	0.326256	-0.420713	0.687718	0.360389	-0.0318109	-0.492791	-0.0430937	0.0231941	-0.81099	-0.3909	0.346676	0.298054	-0.0375392	0.256586	-0.0216838	0.0742135		µA>400A400-1	0.626573	0.441581	0.626425	0.156322	0.603192	0	0.0338392	0.155117	0.271927	0.169404	0.00019902	0.103815	0.03234	0.000404716	0.0994323	0.88824	0.0197982	0.848983	0.918397
	µA<400A400-1	-0.054583	-0.139416	-0.0566192	-0.0184775	-0.0844799	0.41747	1	-0.372691	-0.0532394	0.168177	0.468779	0.625889	-0.394063	0.314274	0.513863	-0.114859	-0.162612	-0.223644	-0.0101998	-0.191398	-0.629451	0.100262	0.544725	0.21382	0.148236	-0.0163608	0.098447		µA<400A400-1	0.80936	0.536059	0.783528	0.934953	0.708564	0.0338392	0	0.0607796	0.813972	0.454383	0.0157076	0.000626389	0.0463764	0.154324	0.0144316	0.610765	0.469662	0.317068	0.964068
	A400	0.736232	-0.349206	0.0225614	-0.381843	0.362527	-0.287025	-0.372691	1	0.423745	-0.0511543	-0.458291	-0.371398	0.896889	-0.301677	0.0474174	0.633763	0.13883	0.350828	-0.411161	0.0618707	0.274657	-0.809471	-0.572431	0.119086	-0.309289	0.379358	0.526887		A400	< 0,0001	0.111175	0.912888	0.0794975	0.0972954	0.155117	0.0607796	0	0.0493847	0.821142	0.0185445	0.0617505	< 0,0001	0.17243	0.834025	0.00154079	0.537793	0.109413	0.0573019
	Rini	0.367188	0.259831	0.0800324	0.147524	0.210137	-0.244937	-0.0532394	0.423745	1	-0.53384	-0.315313	-0.193926	0.452032	-0.221067	0.00602895	-0.106218	-0.000527086	-0.115122	0.0357416	0.129867	0.105521	-0.557719	-0.329765	0.0462448	0.0745874	0.286871	0.0834489		Rini	0.0927544	0.242901	0.723308	0.512367	0.347919	0.271927	0.813972	0.0493847	0	0.0104994	0.152893	0.387175	0.0346806	0.322823	0.978757	0.638025	0.998143	0.609946	0.87453
	d R	-0.27046	-0.0231101	-0.13397	-0.156236	-0.107935	0.303716	0.168177	-0.0511543	-0.53384	1	0.162714	0.0622337	-0.0278644	0.00822919	0.218751	0.252348	0.183715	0.101075	-0.101626	-0.397881	-0.138171	0.235614	0.0289126	-0.142985	-0.245912	0.0783144	-0.0267233		d R	0.223464	0.918692	0.552256	0.487483	0.632573	0.169404	0.454383	0.821142	0.0104994	0	0.469378	0.783217	0.902036	0.971007	0.328047	0.25722	0.413127	0.654472	0.652703
	µG>400G400-1	-0.253622	0.00861369	-0.157088	-0.0450604	-0.124754	0.666841	0.468779	-0.458291	-0.315313	0.162714	1	0.799387	-0.578011	0.219882	0.541397	-0.110926	-0.245754	0.0614034	-0.134834	-0.695782	0.0174609	0.300391	0.42891	-0.0779414	-0.0995254	0.079924	-0.0835249		µG>400G400-1	0.254745	0.969653	0.443451	0.842173	0.580152	0.00019902	0.0157076	0.0185445	0.152893	0.469378	0	< 0,0001	0.00198387	0.325489	0.00926306	0.623114	0.270279	0.786044	0.549671
	µG<400G400-1	-0.190421	0.082423	-0.145387	0.120047	0.166913	0.326256	0.625889	-0.371398	-0.193926	0.0622337	0.799387	1	-0.478469	0.126043	0.424477	-0.13656	-0.169573	-0.182198	-0.136672	-0.202567	0.0673045	0.0444822	0.411432	-0.0151532	-0.00150768	0.108106	-0.0873293		µG<400G400-1	0.395979	0.71537	0.47854	0.594632	0.457831	0.103815	0.000626389	0.0617505	0.387175	0.783217	< 0,0001	0	0.0134136	0.576214	0.0489518	0.544525	0.450591	0.417064	0.544191
	G400	0.642557	-0.328862	-0.00588364	-0.311289	0.366524	-0.420713	-0.394063	0.896889	0.452032	-0.0278644	-0.578011	-0.478469	1	-0.302081	-0.0360776	0.537152	0.242199	0.28994	-0.285899	0.174438	0.268845	-0.793931	-0.639286	-0.0475939	-0.274742	0.331849	0.321015		G400	0.00126057	0.135074	0.977243	0.158489	0.093392	0.03234	0.0463764	< 0,0001	0.0346806	0.902036	0.00198387	0.0134136	0	0.171828	0.87336	0.00994189	0.27749	0.190573	0.197108
	µETR>400ETR400-1	-0.113708	-0.236164	0.340843	-0.272308	-0.0422796	0.687718	0.314274	-0.301677	-0.221067	0.00822919	0.219882	0.126043	-0.302081	1	-0.137096	-0.204802	-0.581422	-0.430045	0.346475	-0.177064	-0.538555	0.250332	0.105168	-0.0995773	0.775617	-0.330225	-0.185806		µETR>400ETR400-1	0.614369	0.290006	0.120595	0.220192	0.851805	0.000404716	0.154324	0.17243	0.322823	0.971007	0.325489	0.576214	0.171828	0	0.542931	0.360571	0.00453842	0.0457535	0.11419
	µETR<400ETR400-1	0.0175011	-0.0213992	-0.0335425	-0.0503858	0.00763522	0.360389	0.513863	0.0474174	0.00602895	0.218751	0.541397	0.424477	-0.0360776	-0.137096	1	0.243198	-0.0705194	0.29127	-0.431141	-0.550299	0.0498569	0.0700789	-0.062706	-0.183616	-0.356608	0.589679	0.069046		µETR<400ETR400-1	0.938384	0.924694	0.882196	0.823787	0.973099	0.0994323	0.0144316	0.834025	0.978757	0.328047	0.00926306	0.0489518	0.87336	0.542931	0	0.275453	0.755157	0.188455	0.0451438
	ETR400	0.690498	-0.315523	-0.0355681	-0.505754	0.350493	-0.0318109	-0.114859	0.633763	-0.106218	0.252348	-0.110926	-0.13656	0.537152	-0.204802	0.243198	1	-0.137073	0.785009	-0.835092	-0.192832	0.144078	-0.131002	-0.12379	0.0451851	-0.195627	0.0157909	0.646803		ETR400	0.000374966	0.152605	0.875134	0.0163357	0.109775	0.88824	0.610765	0.00154079	0.638025	0.25722	0.623114	0.544525	0.00994189	0.360571	0.275453	0	0.543	< 0,0001	< 0,0001
	µNPQ>400NPQ400-1	-0.163712	0.120323	-0.262393	0.363502	0.0867624	-0.492791	-0.162612	0.13883	-0.000527086	0.183715	-0.245754	-0.169573	0.242199	-0.581422	-0.0705194	-0.137073	1	0.0818693	0.225747	0.27382	0.134944	-0.341214	-0.189	0.00867479	-0.59924	0.305393	-0.0608846		µNPQ>400NPQ400-1	0.466621	0.593782	0.238118	0.0963322	0.701036	0.0197982	0.469662	0.537793	0.998143	0.413127	0.270279	0.450591	0.27749	0.00453842	0.755157	0.543	0	0.717206	0.312421
	µNPQ<400NPQ400-1	0.508959	-0.235937	-0.203614	-0.266301	0.278848	-0.0430937	-0.223644	0.350828	-0.115122	0.101075	0.0614034	-0.182198	0.28994	-0.430045	0.29127	0.785009	0.0818693	1	-0.800997	-0.287492	0.287299	0.0502043	0.0547864	0.0680135	-0.426137	0.0365753	0.509725		µNPQ<400NPQ400-1	0.0155602	0.290483	0.363424	0.230942	0.208872	0.848983	0.317068	0.109413	0.609946	0.654472	0.786044	0.417064	0.190573	0.0457535	0.188455	< 0,0001	0.717206	0	< 0,0001
	NPQ400	-0.571778	0.112733	0.0509399	0.201517	-0.304373	0.0231941	-0.0101998	-0.411161	0.0357416	-0.101626	-0.134834	-0.136672	-0.285899	0.346475	-0.431141	-0.835092	0.225747	-0.800997	1	0.278966	-0.217358	-0.0206805	-0.0181806	-0.0599806	0.336637	-0.143687	-0.551201		NPQ400	0.00543342	0.61743	0.82188	0.368491	0.168438	0.918397	0.964068	0.0573019	0.87453	0.652703	0.549671	0.544191	0.197108	0.11419	0.0451438	< 0,0001	0.312421	< 0,0001	0
	µETR/A>400ETR/A400-1	-0.0174658	0.0535918	-0.0588924	0.263777	0.0520457	-0.81099	-0.191398	0.0618707	0.129867	-0.397881	-0.695782	-0.202567	0.174438	-0.177064	-0.550299	-0.192832	0.27382	-0.287492	0.278966	1	0.0366066	-0.194288	-0.13406	-0.0250806	0.195523	-0.131094	-0.153197		µETR/A>400ETR/A400-1	0.938508	0.812762	0.794608	0.235561	0.818075	< 0,0001	0.393514	0.784452	0.564599	0.0666754	0.000323568	0.365949	0.437507	0.43053	0.00796267	0.389911	0.21754	0.194514	0.20867
	µETR/A<400ETR/A400-1	0.0253141	0.118107	-0.18338	0.117219	0.22194	-0.3909	-0.629451	0.274657	0.105521	-0.138171	0.0174609	0.0673045	0.268845	-0.538555	0.0498569	0.144078	0.134944	0.287299	-0.217358	0.0366066	1	-0.192831	-0.318187	-0.140932	-0.369207	0.385213	-0.0411999		µETR/A<400ETR/A400-1	0.910966	0.600644	0.413994	0.603405	0.320867	0.0720479	0.00169643	0.216081	0.640246	0.539743	0.938525	0.766011	0.226349	0.00971313	0.82561	0.522373	0.549342	0.194827	0.331214
	ETR/A400	-0.464127	0.260086	0.0290984	0.0758434	-0.224466	0.346676	0.100262	-0.809471	-0.557719	0.235614	0.300391	0.0444822	-0.793931	0.250332	0.0700789	-0.131002	-0.341214	0.0502043	-0.0206805	-0.194288	-0.192831	1	0.49004	-0.182372	0.302973	-0.409053	-0.366769		ETR/A400	0.0295603	0.242421	0.897719	0.737281	0.315246	0.113967	0.657084	< 0,0001	0.00699757	0.291165	0.174359	0.844173	< 0,0001	0.261169	0.756642	0.561172	0.120166	0.824413	0.927217
	C-loss400	-0.0568271	-0.111703	-0.163845	-0.0147865	-0.260783	0.298054	0.544725	-0.572431	-0.329765	0.0289126	0.42891	0.411432	-0.639286	0.105168	-0.062706	-0.12379	-0.189	0.0547864	-0.0181806	-0.13406	-0.318187	0.49004	1	0.739864	0.103593	-0.52396	0.293343		C-loss400	0.80167	0.620666	0.423833	0.947927	0.241116	0.139169	0.00401019	0.00224384	0.133942	0.898369	0.0287878	0.0367774	0.000438311	0.64137	0.78161	0.583105	0.399579	0.808662	0.935996
	É-loss400	0.38424	-0.274356	0.0142783	-0.124528	-0.108161	-0.0375392	0.21382	0.119086	0.0462448	-0.142985	-0.0779414	-0.0151532	-0.0475939	-0.0995773	-0.183616	0.0451851	0.00867479	0.0680135	-0.0599806	-0.0250806	-0.140932	-0.182372	0.739864	1	-0.155661	-0.411252	0.758656		É-loss400	0.0774724	0.216605	0.949715	0.580844	0.631856	0.868271	0.339337	0.597608	0.838076	0.525568	0.730273	0.946638	0.833415	0.65929	0.413385	0.841741	0.969437	0.763614	0.790894
	µE>400E400-1	-0.064003	0.0724997	0.23205	-0.168503	0.159514	0.256586	0.148236	-0.309289	0.0745874	-0.245912	-0.0995254	-0.00150768	-0.274742	0.775617	-0.356608	-0.195627	-0.59924	-0.426137	0.336637	0.195523	-0.369207	0.302973	0.103593	-0.155661	1	-0.437118	-0.292888		µE>400E400-1	0.777202	0.748494	0.253998	0.453495	0.478278	0.205764	0.469869	0.124174	0.741487	0.269961	0.628579	0.994168	0.174361	< 0,0001	0.103296	0.382944	0.00320683	0.0479806	0.125544
	µE<400E400-1	-0.123188	0.0685159	0.0184528	0.291956	0.0408775	-0.0216838	-0.0163608	0.379358	0.286871	0.0783144	0.079924	0.108106	0.331849	-0.330225	0.589679	0.0157909	0.305393	0.0365753	-0.143687	-0.131094	0.385213	-0.409053	-0.52396	-0.411252	-0.437118	1	-0.0898547		µE<400E400-1	0.584954	0.761916	0.928708	0.187368	0.856669	0.916265	0.936773	0.0559572	0.195523	0.729028	0.697933	0.599119	0.0976812	0.133367	0.00387318	0.944395	0.166944	0.871626	0.523516
	EF400	0.779425	-0.445443	0.0951691	-0.410189	0.166111	0.0742135	0.098447	0.526887	0.0834489	-0.0267233	-0.0835249	-0.0873293	0.321015	-0.185806	0.069046	0.646803	-0.0608846	0.509725	-0.551201	-0.153197	-0.0411999	-0.366769	0.293343	0.758656	-0.292888	-0.0898547	1		EF400	< 0,0001	0.0377499	0.643755	0.0579512	0.460026	0.718621	0.632323	0.00568321	0.711973	0.90603	0.684993	0.671416	0.109819	0.407738	0.760126	0.00114158	0.787811	0.0153794	0.00783987
[truncated: 8 more columns]
